# Supplementary material for: Use of Fertility Control (Nicarbazin) in Barcelona: An Effective yet Respectful Method towards Animal Welfare for the Management of Conflictive Feral Pigeon Colonies
Source: MDPI journal article supplement (doi:10.3390/ani12070856), 2022-03-29
Supplement: s1 [file s1]

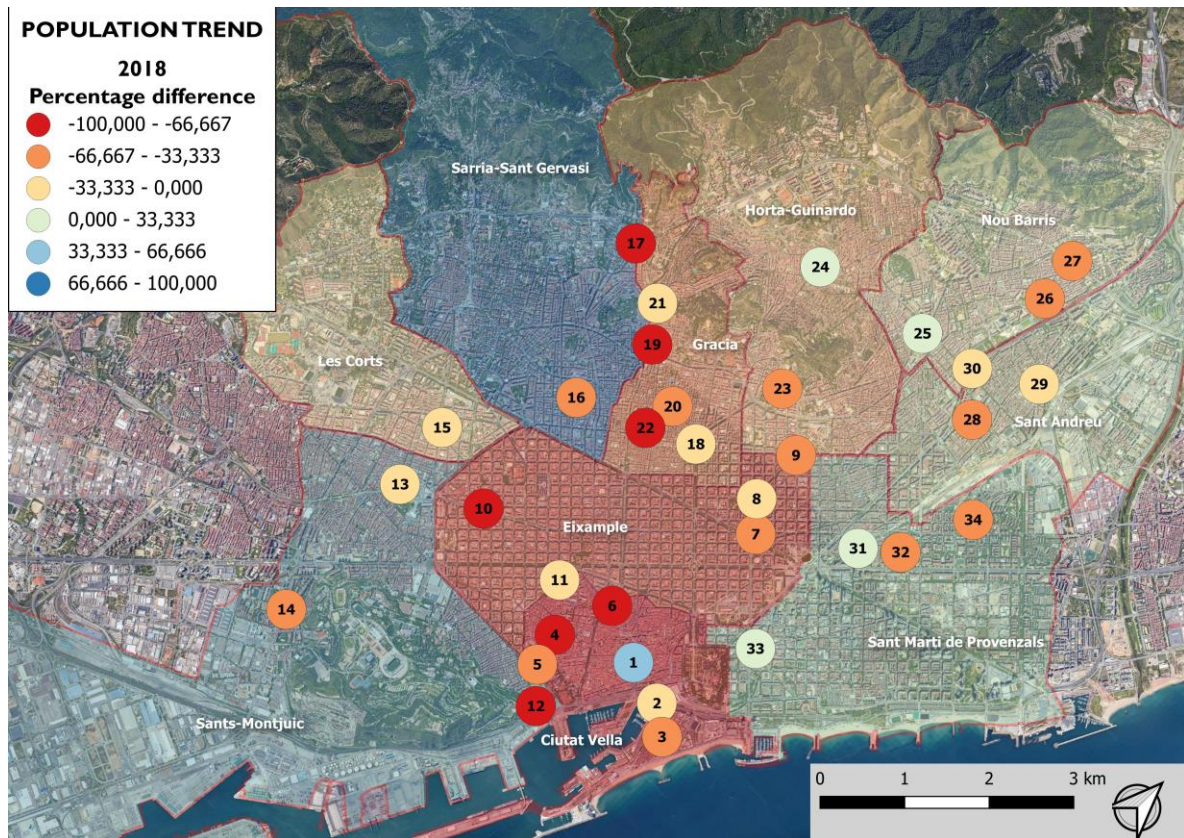

**Figure S1.** Heat map of the population trends registered between the 2018 pre-treatment and post-treatment periods in the pigeon colonies included in the study.

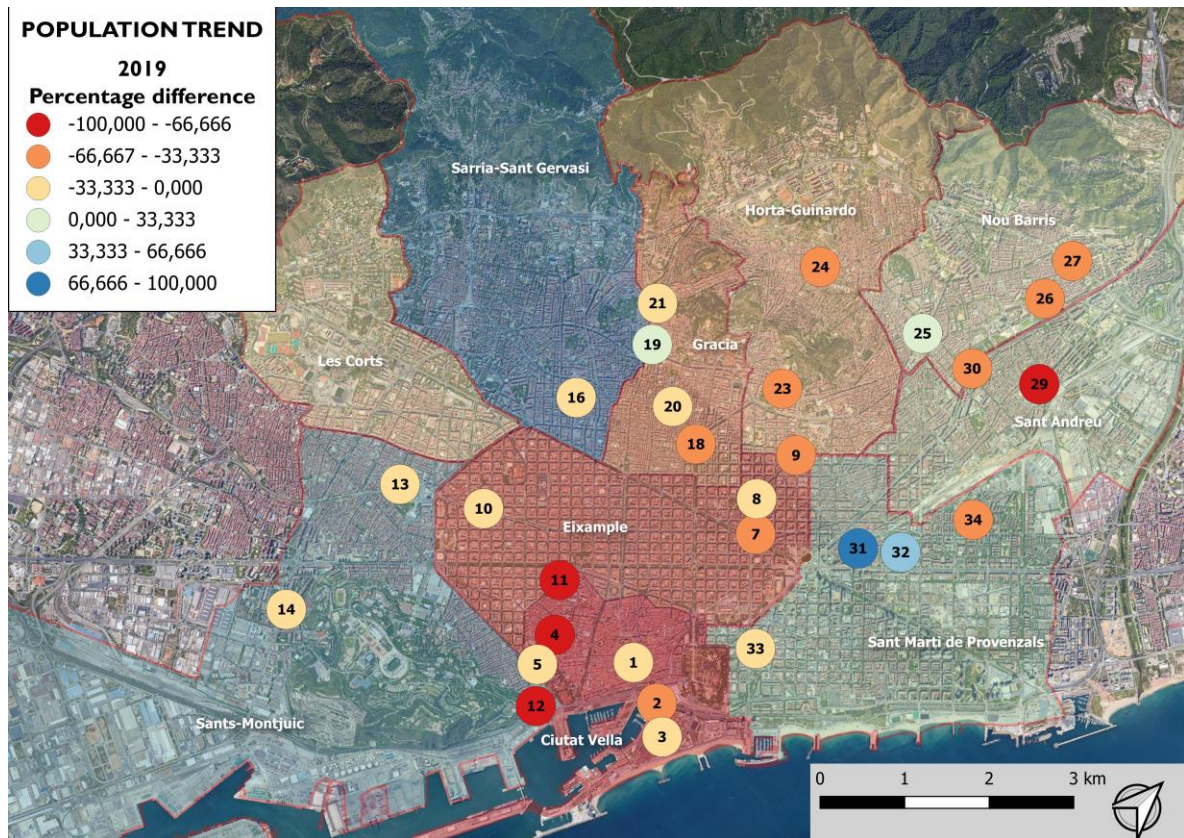

**Figure S2.** Heat map of the population trends registered between the 2019 pre-treatment and post-treatment periods in the pigeon colonies included in the study.
